# Supplementary material for: Metagenomics Reveals Pathogenic Diversity and Temporal Dynamics in Severe Pneumonia Among Patients in Adult Intensive Care Unit
Source: Research Square preprint supplement (doi:10.21203/rs.3.rs-8552663/v1), 2026-01-16
Supplement: Supplementary file 1 [file 5b8d93ad51ec453bef4a8efe.xlsx]

## Sheet: Sheet1
Table S1. Patient characteristics.
ID	Age	Gender	Fever 1.yes,0.no	Hypertension 1.yes,0.no	Diabetes 1.yes,0.no	Smoke 1.yes,0.no	Mechanical ventilation 1.yes,0.no	Sepsis/septic shock 1.yes,0.no	Outcome 1.Non-survivors,0.Survivors	ICU time (days)	WBC (× 109/L)	RBC (× 109/L)	NEU (%)	LYM (%)	HB(g/L)	PLT(× 109/L)	PCT (ng/mL)	CRP (mg/L)
N1_1B	87	male	0	0	1	1	1	0	0	1	9.26	3.77	87	8.48	89	33	4.72	163.9
N2-1S	39	male	0	0	0	0	1	1	0	16	12.74	2.33	75.3	10	68	197	0.64	106.44
N3-1S	90	female	0	1	0	0	1	0	0	54	15.24	3.06	90.6	5.18	89	62.5	2.1	37.99
N4-1S	70	male	1	1	0	0	1	1	0	37	7.87	2.3	81.03	7.04	62.1	71.8	1.7	83.93
N5-1S	84	male	0	1	0	0	1	1	1	2	18.85	2.01	94.4	1.99	58.9	65.8	8.83	192
N6-1S	70	female	0	0	0	0	1	1	0	2	19.97	3.33	91.01	4	95.7	638.7	0.315	161.08
N7-1S	58	male	0	1	0	0	1	1	0	2	20.52	4.13	96.87	1.52	106.1	283.7	2.39	174.05
N8-1S	43	male	1	0	0	0	1	0	0	12	13.24	4.72	82.5	10.94	138.9	248.1	0.526	115.26
N9-1S	91	female	1	1	0	0	1	0	0	15	12.05	3.1	81	10	93	228	0.047	44.09
N10-1S	55	male	0	1	0	0	1	0	1	2	11.49	4.5	79.6	4.3	102	27	5.67	173.52
N11-1S	55	male	0	1	1	1	1	1	0	57	9.67	3.42	/	17.75	96.6	283.7	0.285	29.48
N12-1S	68	male	0	1	0	1	0	1	0	9	46.59	2.75	/	4.14	85.4	222.9	1.73	135.06
N13-1S	66	female	0	0	0	0	0	0	1	16	16.77	3.41	94.3	4.33	87.5	125.8	3.18	107.6
N14-1S	63	male	0	1	0	1	1	0	1	2	8.62	2.14	/	0.3	72	29	2.97	140.97
N15-1S	52	male	1	1	0	0	1	0	0	9	11.38	2.01	/	13.56	64.6	217	0.6	45.07
N16-1S	72	male	0	1	0	1	1	1	0	7	9.96	3.29	77.27	10.78	100.9	219.4	0.221	31.5
N17-1S	62	male	1	1	1	1	1	0	0	2	28.33	4.72	90.41	3.97	98.7	221.4	3.69	99.71
N18-1S	71	male	0	1	0	0	0	1	0	10	11.76	3.13	95	2.4	93.4	41.3	3.56	104.08
N19-1S	63	female	0	0	1	0	0	0	0	122	10.89	3.79	76.4	10.8	115	150	1.69	121.46
N20-1S	46	male	0	0	0	0	1	1	0	3	14.81	2.13	80.8	5.33	54.7	472.9	1.47	192
N21-1S	100	female	0	1	0	0	0	0	0	16	9.1	3.14	75.4	11.87	94.9	92	0.836	72
N22-1S	58	male	1	0	1	1	1	1	0	19	11.08	3.37	96.2	2.3	95	38	20.7	192
N23-1S	60	female	0	0	0	0	1	1	1	4	32.18	3.98	35.6	6.1	108	44	30.1	68.2
N24-1S	72	male	1	0	0	0	1	0	2	4	6.1	4.29	87.8	3.8	98	108	56.07	160.6
N25-1S	71	male	1	0	0	1	1	1	2	12	12.6	/	87.6	/	83	78	15.32	180.4
