# Supplementary material for: Metagenomics Reveals Pathogenic Diversity and Temporal Dynamics in Severe Pneumonia Among Patients in Adult Intensive Care Unit
Source: Research Square preprint supplement (doi:10.21203/rs.3.rs-8552663/v1), 2026-01-16
Supplement: Supplementary file 2 [file a98bc1868fdfeaa1dca51cb0.xlsx]

## Sheet: Sheet1
Table S2. Detection of pathogens in plasma and BALF samples.
ID	Species	Reads	RPM
N1_1B	Candida orthopsilosis	465334	15252.7
N1_1B	Candida albicans	19634	643.562
N1_1B	Candida dubliniensis	17555	575.417
N1_1B	Debaryomyces hansenii	10670	349.741
N1_1B	Candida glabrata	2484	81.4204
N1_1B	Pichia kudriavzevii	1796	58.8692
N1_1B	Saccharomyces cerevisiae	1721	56.4108
N1_1B	Parvimonas micra	691	22.6495
N1_1B	Salmonella enterica	653	21.404
N1_1B	Stenotrophomonas maltophilia	379	12.4228
N1_1B	Escherichia coli	192	6.29336
N1_1B	Corynebacterium striatum	181	5.93281
N1_1B	Acinetobacter baumannii	163	5.3428
N1_1B	Aspergillus fumigatus	138	4.52335
N1_1B	Cryptococcus neoformans	110	3.60557
N1_1B	Aspergillus oryzae	87	2.85168
N1_2B	Acinetobacter baumannii	4218	148.094
N1_2B	Candida orthopsilosis	782	27.4561
N1_2B	Human betaherpesvirus 5	75	2.63325
N1_2B	Candida albicans	35	1.22885
N1_2B	Candida dubliniensis	29	1.01819
N1_2B	Debaryomyces hansenii	12	0.421321
N1_3B	Acinetobacter baumannii	20511	703.252
N1_3B	Candida orthopsilosis	320	10.9717
N1_3B	Enterococcus faecium	227	7.78305
N1_3B	Candida dubliniensis	18	0.617158
N1_4S	Corynebacterium striatum	9180733	291007
N1_4S	Corynebacterium resistens	66584	2110.55
N1_4S	Klebsiella pneumoniae	23673	750.376
N1_4S	Acinetobacter baumannii	18366	582.157
N1_4S	Enterococcus faecium	15144	480.027
N1_4S	Escherichia coli	3726	118.105
N1_4S	Salmonella enterica	1207	38.2589
N1_4S	Human gammaherpesvirus 4	141	4.46935
N1_4S	Enterobacter cloacae	43	1.36299
N1_4S	Candida orthopsilosis	32	1.01432
N1_4S	Candida albicans	20	0.633951
N2-1S	Burkholderia cenocepacia	2040	70.6328
N2-1S	Stenotrophomonas maltophilia	545	18.87
N2-1S	Pseudomonas aeruginosa	379	13.1225
N2-1S	Corynebacterium striatum	201	6.95941
N2-1S	Klebsiella pneumoniae	196	6.78629
N2-1S	Human betaherpesvirus 5	77	2.66604
N2-1S	Escherichia coli	37	1.28109
N2-2S	Burkholderia cenocepacia	2582	81.9921
N2-2S	Stenotrophomonas maltophilia	1385	43.981
N2-2S	Acinetobacter baumannii	156	4.95382
N2-2S	Human betaherpesvirus 5	85	2.6992
N2-2S	Staphylococcus haemolyticus	42	1.33372
N2-3S	Burkholderia cenocepacia	6088	186.494
N2-3S	Human betaherpesvirus 5	40	1.22532
N2-3S	Torque teno virus 18	28	0.857726
N2-4S	Escherichia coli	2603	77.8206
N2-4S	Stenotrophomonas maltophilia	2021	60.4208
N2-4S	Burkholderia cenocepacia	1811	54.1426
N2-4S	Klebsiella pneumoniae	396	11.839
N2-4S	Human betaherpesvirus 5	78	2.33193
N2-4S	Torque teno virus 22	22	0.657723
N3-1S	Corynebacterium striatum	367	12.2853
N3-1S	Human alphaherpesvirus 1	49	1.64027
N3-2S	Pseudomonas aeruginosa	7593	285.469
N3-2S	Acinetobacter baumannii	124	4.66195
N3-2S	Corynebacterium striatum	17	0.639139
N4-1S	Corynebacterium striatum	78235	2422.79
N4-1S	Acinetobacter baumannii	1209	37.4404
N4-1S	Stenotrophomonas maltophilia	672	20.8105
N4-1S	Corynebacterium resistens	609	18.8595
N4-1S	Bacteroides fragilis	114	3.53036
N4-1S	Achromobacter xylosoxidans	104	3.22068
N4-1S	Escherichia coli	47	1.4555
N4-2S	Corynebacterium striatum	1844434	68260.8
N4-2S	Acinetobacter baumannii	20613	762.868
N4-2S	Stenotrophomonas maltophilia	16682	617.386
N4-2S	Corynebacterium resistens	14392	532.635
N4-2S	Achromobacter xylosoxidans	10309	381.527
N4-2S	Escherichia coli	474	17.5423
N4-2S	Pseudomonas aeruginosa	351	12.9902
N4-2S	Bacteroides fragilis	341	12.6201
N4-2S	Klebsiella pneumoniae	319	11.8059
N4-2S	Salmonella enterica	214	7.91994
N4-2S	Candida albicans	35	1.29532
N4-2S	Pichia kudriavzevii	14	0.518127
N4-3S	Corynebacterium striatum	8500764	280231
N4-3S	Acinetobacter baumannii	153801	5070.12
N4-3S	Enterococcus faecium	106606	3514.31
N4-3S	Corynebacterium resistens	49324	1625.99
N4-3S	Klebsiella pneumoniae	40701	1341.73
N4-3S	Bacteroides fragilis	18423	607.322
N4-3S	Stenotrophomonas maltophilia	6622	218.297
N4-3S	Enterococcus faecalis	4233	139.543
N4-3S	Escherichia coli	4173	137.565
N4-3S	Salmonella enterica	1171	38.6025
N4-3S	Achromobacter xylosoxidans	465	15.3289
N4-3S	Pseudomonas aeruginosa	123	4.05475
N4-3S	Staphylococcus aureus	96	3.16468
N4-3S	Enterobacter cloacae	53	1.74717
N4-3S	Candida albicans	29	0.955997
N4-4S	Klebsiella pneumoniae	893435	27140.7
N4-4S	Escherichia coli	17468	530.642
N4-4S	Salmonella enterica	5402	164.102
N4-4S	Bacteroides fragilis	3941	119.719
N4-4S	Corynebacterium striatum	2985	90.6782
N4-4S	Acinetobacter baumannii	2096	63.6722
N4-4S	Achromobacter xylosoxidans	674	20.4747
N4-4S	Stenotrophomonas maltophilia	557	16.9205
N4-4S	Enterobacter cloacae	278	8.44507
N4-4S	Pseudomonas aeruginosa	66	2.00494
N4-4S	Candida albicans	36	1.09361
N5-1S	Candida albicans	1978	73.9453
N5-1S	Klebsiella pneumoniae	365	13.6451
N5-1S	Stenotrophomonas maltophilia	133	4.97205
N5-1S	Corynebacterium striatum	104	3.88792
N5-1S	Human betaherpesvirus 5	11	0.411223
N5-1S	Candida glabrata	11	0.411223
N5-2S	Klebsiella pneumoniae	369698	13313.8
N5-2S	Escherichia coli	8243	296.852
N5-2S	Salmonella enterica	1800	64.8228
N5-2S	Candida albicans	920	33.1316
N5-2S	Stenotrophomonas maltophilia	504	18.1504
N5-2S	Pseudomonas aeruginosa	156	5.61797
N5-2S	Human betaherpesvirus 5	84	3.02506
N5-2S	Enterobacter cloacae	72	2.59291
N5-2S	Acinetobacter baumannii	40	1.44051
N5-2S	Human alphaherpesvirus 1	27	0.972342
N5-3S	Pseudomonas aeruginosa	3361	116.784
N5-3S	Klebsiella pneumoniae	2572	89.3686
N5-3S	Stenotrophomonas maltophilia	787	27.3457
N5-3S	Human betaherpesvirus 5	158	5.48998
N5-3S	Candida albicans	128	4.44758
N5-3S	Corynebacterium striatum	44	1.52886
N5-3S	Human betaherpesvirus 7	12	0.416961
N6-1S	Candida albicans	320149	11048.7
N6-1S	Candida dubliniensis	1105	38.1348
N6-1S	Corynebacterium striatum	1005	34.6837
N6-1S	Debaryomyces hansenii	964	33.2687
N6-1S	Candida glabrata	276	9.52507
N6-1S	Staphylococcus epidermidis	42	1.44947
N6-1S	Stenotrophomonas maltophilia	37	1.27691
N6-2S	Klebsiella pneumoniae	11006629	357164
N6-2S	Escherichia coli	164565	5340.12
N6-2S	Candida albicans	114127	3703.41
N6-2S	Salmonella enterica	44704	1450.64
N6-2S	Stenotrophomonas maltophilia	3860	125.257
N6-2S	Enterobacter cloacae	1805	58.5721
N6-2S	Pseudomonas aeruginosa	668	21.6765
N6-2S	Acinetobacter baumannii	518	16.809
N6-2S	Candida dubliniensis	405	13.1422
N6-2S	Candida glabrata	85	2.75824
N6-3S	Klebsiella pneumoniae	12934820	358449
N6-3S	Escherichia coli	284716	7890.03
N6-3S	Salmonella enterica	63984	1773.12
N6-3S	Corynebacterium striatum	16331	452.564
N6-3S	Stenotrophomonas maltophilia	7064	195.757
N6-3S	Candida albicans	6163	170.789
N6-3S	Streptococcus oralis	5169	143.243
N6-3S	Staphylococcus epidermidis	4273	118.413
N6-3S	Enterobacter cloacae	2781	77.0669
N6-3S	Acinetobacter baumannii	870	24.1094
N6-3S	Pseudomonas aeruginosa	841	23.3057
N6-3S	Corynebacterium resistens	299	8.28587
N7-1S	Staphylococcus epidermidis	10661	341.892
N7-1S	Corynebacterium tuberculostearicum	551	17.6703
N7-1S	Streptococcus oralis	190	6.0932
N7-1S	Enterococcus faecium	182	5.83664
N7-1S	Corynebacterium striatum	46	1.47519
N7-1S	Actinomyces pacaensis	26	0.833806
N7-1S	Human alphaherpesvirus 1	40	1.28278
N7-1S	Enterococcus faecalis	24	0.769667
N7-1S	Human gammaherpesvirus 4	16	0.513111
N7-2S	Staphylococcus haemolyticus	5196285	158450
N7-2S	Corynebacterium tuberculostearicum	1968248	60017.6
N7-2S	Corynebacterium striatum	54353	1657.38
N7-2S	Actinomyces pacaensis	2972	90.625
N7-2S	Human alphaherpesvirus 1	1077	32.8409
N7-2S	Human gammaherpesvirus 4	805	24.5468
N7-2S	Klebsiella pneumoniae	426	12.99
N7-2S	Escherichia coli	363	11.0689
N7-2S	Acinetobacter baumannii	49	1.49415
N7-2S	Candida orthopsilosis	13	0.396408
N7-2S	Enterobacter cloacae	12	0.365915
N7-3S	Human alphaherpesvirus 1	37417	1679.93
N7-3S	Staphylococcus epidermidis	33826	1518.7
N7-3S	Ralstonia mannitolilytica	6025	270.507
N7-3S	Human alphaherpesvirus 2	81	3.63669
N7-4S	Actinomyces pacaensis	286437	10814.3
N7-4S	Corynebacterium tuberculostearicum	188896	7131.67
N7-4S	Rothia mucilaginosa	33990	1283.28
N7-4S	Corynebacterium striatum	4770	180.089
N7-4S	Human alphaherpesvirus 1	3896	147.092
N7-4S	Human gammaherpesvirus 4	2883	108.846
N7-4S	Escherichia coli	447	16.8763
N7-4S	Klebsiella pneumoniae	115	4.34177
N7-4S	Candida albicans	15	0.566317
N8-1S	Chryseobacterium indologenes	2372767	70508.9
N8-1S	Candida orthopsilosis	52685	1565.58
N8-1S	Parvimonas micra	6565	195.085
N8-1S	Corynebacterium segmentosum	3709	110.216
N8-1S	Candida albicans	2101	62.4331
N8-1S	Candida dubliniensis	1896	56.3413
N8-1S	Mogibacterium pumilum	1501	44.6035
N8-1S	Pseudomonas aeruginosa	1702	50.5764
N8-1S	Debaryomyces hansenii	1354	40.2353
N8-1S	Streptococcus anginosus	1209	35.9265
N8-1S	Elizabethkingia anophelis	1064	31.6177
N8-1S	Acinetobacter baumannii	629	18.6913
N8-1S	Candida glabrata	459	13.6396
N8-1S	Saccharomyces cerevisiae	191	5.67573
N8-1S	Pichia kudriavzevii	181	5.37858
N8-1S	Escherichia coli	108	3.20932
N8-1S	Stenotrophomonas maltophilia	60	1.78295
N8-1S	Human alphaherpesvirus 1	54	1.60466
N8-1S	Enterobacter cloacae	30	0.891477
N8-1S	Haemophilus influenzae	24	0.713181
N8-1S	Aspergillus oryzae	18	0.534886
N8-1S	Human betaherpesvirus 5	15	0.445738
N8-2S	Parvimonas micra	21076	680.473
N8-2S	Pseudomonas aeruginosa	10343	333.941
N8-2S	Streptococcus anginosus	5523	178.319
N8-2S	Mogibacterium pumilum	3005	97.0213
N8-2S	Candida glabrata	2605	84.1067
N8-2S	Acinetobacter baumannii	1859	60.0209
N8-2S	Klebsiella pneumoniae	395	12.7532
N8-2S	Escherichia coli	306	9.87971
N8-2S	Candida orthopsilosis	103	3.32552
N8-2S	Haemophilus influenzae	37	1.19461
N8-2S	Human alphaherpesvirus 1	35	1.13003
N8-2S	Enterobacter cloacae	25	0.807166
N8-2S	Candida albicans	21	0.678019
N8-2S	Candida dubliniensis	16	0.516586
N8-3S	Chryseobacterium indologenes	134320	3744.02
N8-3S	Corynebacterium segmentosum	41612	1159.89
N8-3S	Pseudomonas aeruginosa	10359	288.746
N8-3S	Parvimonas micra	10225	285.011
N8-3S	Mogibacterium pumilum	2864	79.8309
N8-3S	Streptococcus anginosus	2118	59.0369
N8-3S	Candida orthopsilosis	1071	29.853
N8-3S	Acinetobacter baumannii	827	23.0517
N8-3S	Staphylococcus epidermidis	724	20.1807
N8-3S	Corynebacterium striatum	693	19.3166
N8-3S	Candida glabrata	658	18.341
N8-3S	Escherichia coli	460	12.822
N8-3S	Enterobacter cloacae	117	3.26125
N8-3S	Stenotrophomonas maltophilia	108	3.01038
N8-3S	Candida albicans	49	1.36582
N8-3S	Elizabethkingia anophelis	46	1.2822
N8-3S	Candida dubliniensis	41	1.14283
N8-3S	Debaryomyces hansenii	37	1.03133
N8-3S	Saccharomyces cerevisiae	13	0.362361
N8-3S	Cryptococcus neoformans	5	0.13937
N9-1S	Human alphaherpesvirus 1	17752	666.034
N9-1S	Human alphaherpesvirus 2	56	2.10105
N9-1S	Corynebacterium striatum	33	1.23812
N10-1S	Staphylococcus epidermidis	12960	519.945
N10-1S	Abiotrophia defectiva	25	1.00298
N10-1S	Corynebacterium striatum	24	0.962862
N11-1S	Corynebacterium striatum	332019	11912
N11-1S	Corynebacterium resistens	2339	83.917
N11-1S	Klebsiella pneumoniae	1591	57.0808
N11-1S	Escherichia coli	247	8.8617
N11-1S	Salmonella enterica	63	2.26027
N11-1S	Enterococcus faecium	57	2.04501
N11-1S	Stenotrophomonas maltophilia	43	1.54272
N12-1S	Pseudomonas aeruginosa	72221	2404.85
N12-1S	Stenotrophomonas maltophilia	485	16.1498
N12-1S	Hepatitis B virus	60	1.99791
N12-1S	Human alphaherpesvirus 1	11	0.366284
N13-1S	Saccharomyces cerevisiae	63	2.30834
N13-1S	Candida orthopsilosis	27	0.989287
N13-1S	Pichia kudriavzevii	12	0.439683
N14-1S	Corynebacterium tuberculostearicum	139189	4284.65
N14-1S	Stenotrophomonas maltophilia	130438	4015.27
N14-1S	Human alphaherpesvirus 1	75794	2333.16
N14-1S	Corynebacterium striatum	1511	46.5131
N14-1S	Aspergillus fumigatus	444	13.6676
N14-1S	Torque teno virus 12	218	6.71069
N14-1S	Human alphaherpesvirus 2	182	5.6025
N14-1S	Human gammaherpesvirus 4	107	3.29378
N14-1S	Human betaherpesvirus 5	94	2.8936
N14-1S	Staphylococcus aureus	93	2.86282
N14-1S	Human polyomavirus 1	85	2.61655
N14-1S	Aspergillus oryzae	66	2.03168
N14-1S	Escherichia coli	64	1.97011
N14-1S	Klebsiella pneumoniae	36	1.10819
N14-1S	Pseudomonas aeruginosa	27	0.83114
N14-1S	Saccharomyces cerevisiae	12	0.369396
N15-1S	Corynebacterium striatum	5540077	194795
N15-1S	Enterococcus faecalis	3267366	114884
N15-1S	Staphylococcus epidermidis	50014	1758.54
N15-1S	Corynebacterium resistens	22617	795.237
N15-1S	Burkholderia cenocepacia	6005	211.142
N15-1S	Enterococcus faecium	2324	81.7143
N15-1S	Escherichia coli	1223	43.002
N15-1S	Human alphaherpesvirus 1	821	28.8672
N15-1S	Klebsiella pneumoniae	737	25.9137
N15-1S	Candida albicans	411	14.4512
N15-1S	Torque teno virus 29	64	2.25031
N15-1S	Stenotrophomonas maltophilia	63	2.21515
N15-1S	Acinetobacter baumannii	47	1.65257
N15-1S	Human betaherpesvirus 5	30	1.05483
N15-1S	Enterobacter cloacae	16	0.562577
N16-1S	Corynebacterium segmentosum	82	2.63349
N16-1S	Staphylococcus epidermidis	14	0.449621
N17-1S	Candida glabrata	80112	1853.22
N17-1S	Candida albicans	3061	70.8095
N17-1S	Abiotrophia defectiva	1758	40.6675
N17-1S	Aspergillus fumigatus	351	8.11961
N17-1S	Aspergillus oryzae	214	4.95042
N17-1S	Streptococcus oralis	43	0.994711
N17-1S	Debaryomyces hansenii	38	0.879047
N17-1S	Corynebacterium striatum	34	0.786515
N17-1S	Stenotrophomonas maltophilia	28	0.647719
N18-1S	Stenotrophomonas maltophilia	35129	1043.49
N18-1S	Ralstonia mannitolilytica	5317	157.938
N18-1S	Pseudomonas aeruginosa	51	1.51492
N19-1S	Acinetobacter schindleri	5674	184.219
N19-1S	Staphylococcus aureus	99	3.21425
N19-1S	Candida albicans	85	2.75971
N19-1S	Klebsiella pneumoniae	68	2.20777
N19-1S	Elizabethkingia anophelis	26	0.844147
N20-1S	Klebsiella pneumoniae	4217082	111655
N20-1S	Acinetobacter baumannii	3839708	101664
N20-1S	Staphylococcus aureus	3597778	95258
N20-1S	Corynebacterium striatum	1296165	34318.4
N20-1S	Enterococcus faecium	101887	2697.65
N20-1S	Escherichia coli	62724	1660.74
N20-1S	Pseudomonas aeruginosa	31410	831.639
N20-1S	Salmonella enterica	19301	511.03
N20-1S	Human alphaherpesvirus 1	19219	508.859
N20-1S	Enterobacter cloacae	1389	36.7764
N20-1S	Stenotrophomonas maltophilia	1156	30.6073
N20-1S	Enterococcus faecalis	546	14.4564
N20-1S	Human alphaherpesvirus 2	42	1.11203
N20-1S	Candida glabrata	10	0.264769
N21-1S	Staphylococcus epidermidis	9397832	287271
N21-1S	Candida albicans	221877	6782.28
N21-1S	Candida orthopsilosis	123324	3769.74
N21-1S	Streptococcus anginosus	11395	348.32
N21-1S	Candida dubliniensis	8262	252.551
N21-1S	Debaryomyces hansenii	3355	102.555
N21-1S	Candida glabrata	699	21.3669
N21-1S	Saccharomyces cerevisiae	538	16.4455
N21-1S	Pichia kudriavzevii	490	14.9782
N21-1S	Klebsiella pneumoniae	389	11.8909
N21-1S	Escherichia coli	196	5.99128
N21-1S	Acinetobacter baumannii	77	2.35372
N21-1S	Stenotrophomonas maltophilia	64	1.95634
N21-1S	Aspergillus oryzae	32	0.978168
N21-1S	Cryptococcus neoformans	31	0.9476
N21-1S	Aspergillus fumigatus	16	0.489084
N21-1S	Legionella pneumophila	14	0.427949
N22-1S	Human alphaherpesvirus 1	356696	12270
N22-1S	Staphylococcus epidermidis	6192	212.999
N22-1S	Pseudomonas aeruginosa	1607	55.2793
N22-1S	Human alphaherpesvirus 2	709	24.3889
N22-1S	Klebsiella pneumoniae	572	19.6763
N22-1S	Acinetobacter baumannii	467	16.0644
N22-1S	Escherichia coli	175	6.01984
N22-1S	Enterococcus faecalis	84	2.88952
N22-1S	Candida glabrata	70	2.40793
N22-1S	Torque teno virus 29	16	0.550385
N22-1S	Human betaherpesvirus 5	16	0.550385
N23-1S	Acinetobacter baumannii	7447825	154061
N23-1S	Staphylococcus haemolyticus	47725	987.207
N23-1S	Rothia mucilaginosa	21442	443.534
N23-1S	Escherichia coli	4087	84.5409
N23-1S	Candida orthopsilosis	4006	82.8654
N23-1S	Salmonella enterica	3463	71.6332
N23-1S	Stenotrophomonas maltophilia	2968	61.394
N23-1S	Klebsiella pneumoniae	2069	42.7979
N23-1S	Pseudomonas aeruginosa	395	8.1707
N23-1S	Candida albicans	163	3.37171
N23-1S	Candida dubliniensis	129	2.66841
N23-1S	Debaryomyces hansenii	52	1.07564
N23-1S	Enterobacter cloacae	41	0.848098
N23-1S	Candida glabrata	31	0.641245
N23-1S	Saccharomyces cerevisiae	26	0.537818
N23-1S	Pichia kudriavzevii	23	0.475762
N24-1S	Abiotrophia defectiva	1365574	38650.5
N24-1S	Streptococcus anginosus	169053	4784.79
N24-1S	Parvimonas micra	118288	3347.96
N24-1S	Candida albicans	104554	2959.24
N24-1S	Staphylococcus epidermidis	65726	1860.27
N24-1S	Klebsiella pneumoniae	4474	126.63
N24-1S	Debaryomyces hansenii	1154	32.6622
N24-1S	Haemophilus influenzae	849	24.0296
N24-1S	Escherichia coli	795	22.5013
N24-1S	Candida dubliniensis	435	12.312
N24-1S	Pseudomonas aeruginosa	266	7.52872
N24-1S	Enterobacter cloacae	189	5.34936
N24-1S	Stenotrophomonas maltophilia	84	2.37749
N24-1S	Acinetobacter baumannii	56	1.58499
N24-1S	Human betaherpesvirus 7	15	0.424552
N25-1S	Aspergillus fumigatus	243	7.61692
N25-1S	Staphylococcus epidermidis	86	2.6957
N25-1S	Stenotrophomonas maltophilia	72	2.25687
